# Supplementary material for: 3D Printing of Polycaprolactone–Polyaniline Electroactive Scaffolds for Bone Tissue Engineering
Source: MDPI journal article supplement (doi:10.3390/ma13030512), 2020-01-22

Supplementary Materials

# 3D Printing of Polycaprolactone–Polyaniline Electroactive Scaffolds for Bone Tissue Engineering

Arie Wibowo <sup>1,2,\*</sup>, Cian Vyas <sup>3,\*</sup>, Glen Cooper <sup>3,\*</sup>, Fitriyatul Qulub <sup>1</sup>, Rochim Suratman <sup>1</sup>, Andi Isra Mahyuddin <sup>4</sup>, Tatacipta Dirgantara <sup>5</sup> and Paulo Bartolo <sup>3</sup>

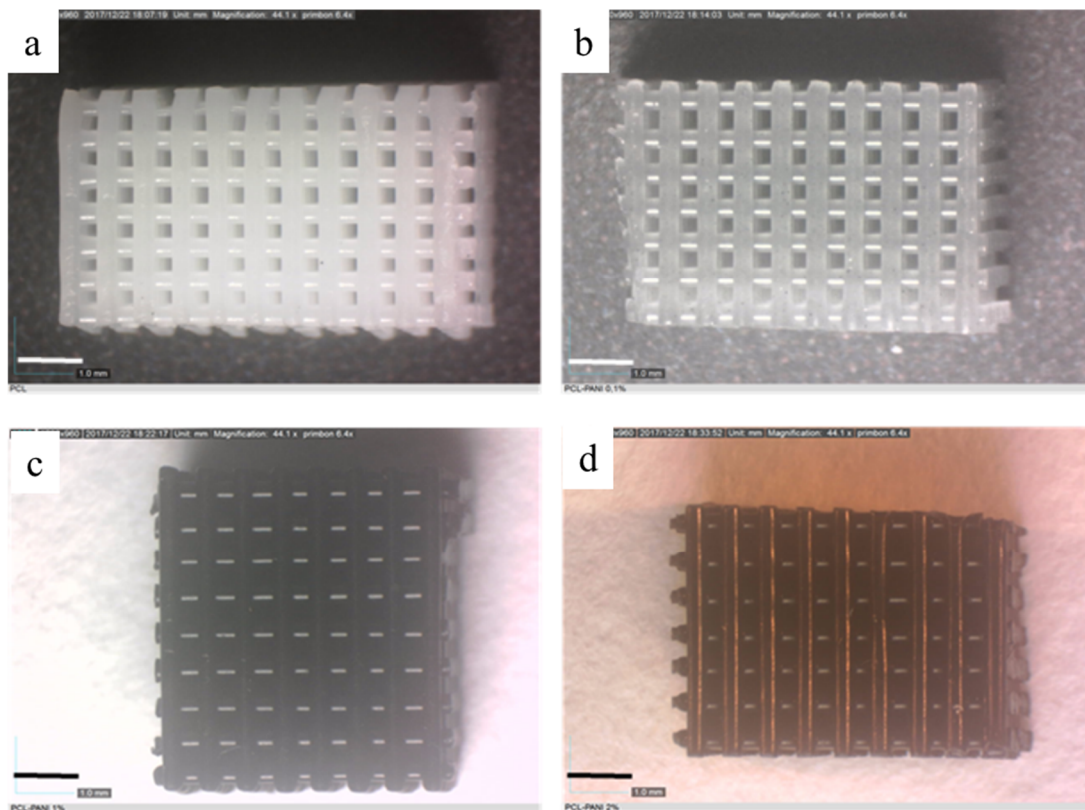

**Figure S1.** Optical microscopy images of the 3D printed PCL/PANI scaffolds: **a)** PCL, **b)** 0.1%, **c)** 1.0% and **d)** 2.0% wt. PANI (scale bar = 1 mm).

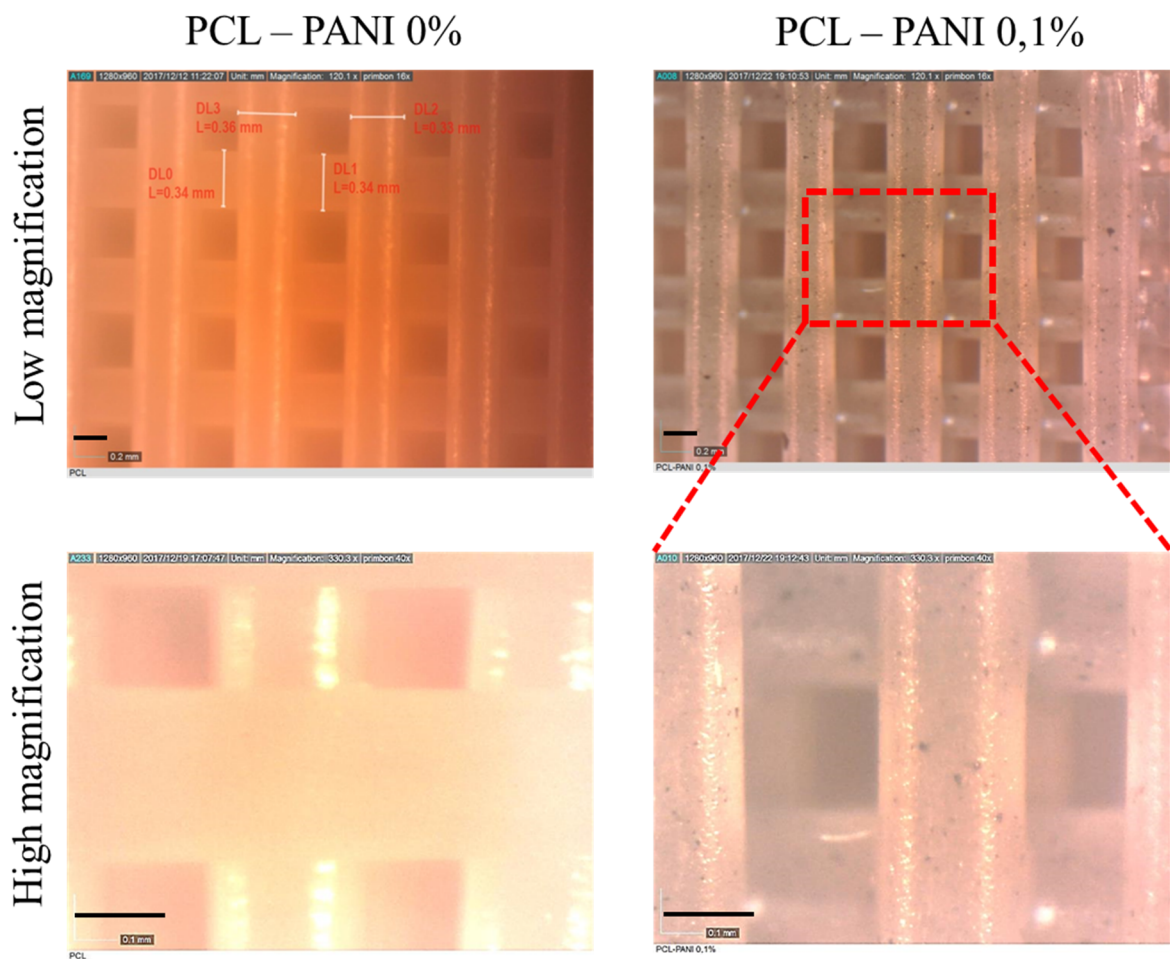

**Figure S2.** Optical microscopy of scaffold with 0 and 0.1 wt.% PANI scaffold highlighting the observable inclusion of the PANI microparticles within the PCL matrix. Scale bar = 0.2 mm.

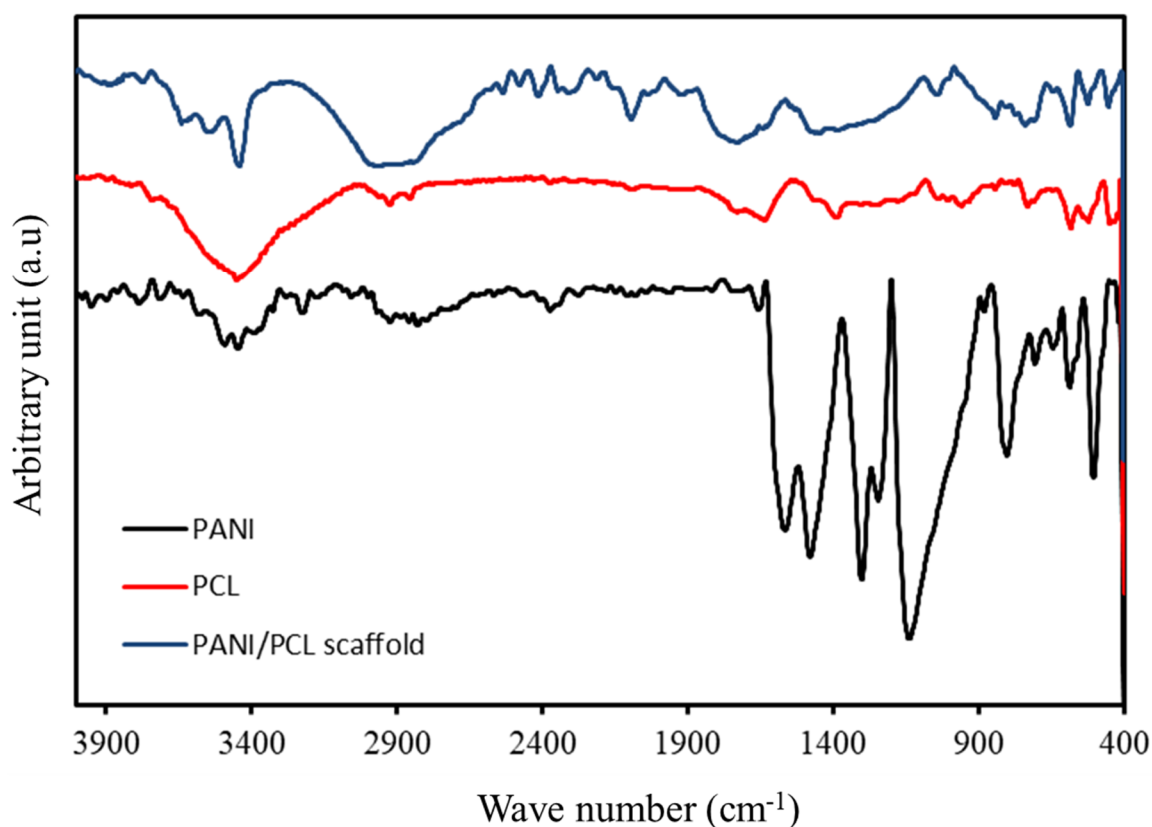

**Figure S3.** FTIR spectra of PANI, PCL and PANI/PCL scaffold. Suggesting that no new bonds are formed between PCL-PANI in the composite scaffold; this implies that only physical blending of PANI and PCL occurred in the PCL/PANI scaffold.

**Table S1.** pH observation of phosphate buffered saline solution after immersion of scaffolds as a function of immersion time (n = 3).

| Incubation time (days) | Samples     |               |               |               |
|------------------------|-------------|---------------|---------------|---------------|
|                        | PCL-PANI 0% | PCL-PANI 0.1% | PCL-PANI 1.0% | PCL-PANI 2.0% |
| 0                      | 7.45 ± 0.02 | 7.45 ± 0.01   | 7.45 ± 0.01   | 7.45 ± 0.01   |
| 1                      | 7.45 ± 0.01 | 7.45 ± 0.02   | 7.45 ± 0.02   | 7.45 ± 0.01   |
| 3                      | 7.44 ± 0.01 | 7.44 ± 0.01   | 7.44 ± 0.01   | 7.44 ± 0.02   |
| 5                      | 7.44 ± 0.01 | 7.44 ± 0.01   | 7.44 ± 0.01   | 7.44 ± 0.01   |
| 7                      | 7.34 ± 0.01 | 7.35 ± 0.01   | 7.34 ± 0.01   | 7.33 ± 0.01   |
| 9                      | 7.34 ± 0.01 | 7.36 ± 0.01   | 7.31 ± 0.02   | 7.32 ± 0.02   |
| 11                     | 7.33 ± 0.02 | 7.34 ± 0.01   | 7.31 ± 0.01   | 7.30 ± 0.01   |
| 14                     | 7.31 ± 0.01 | 7.33 ± 0.03   | 7.28 ± 0.01   | 7.27 ± 0.01   |

**Table S2.** Scaffold weight loss during incubation in PBS solution for up to 15 days (n = 3).

| Sample | Remaining mass of scaffold (%) as incubation time (days) |   |   |   |    |    |
|--------|----------------------------------------------------------|---|---|---|----|----|
|        | 0                                                        | 3 | 6 | 9 | 12 | 15 |
|        |                                                          |   |   |   |    |    |

|               |          |         |         |         |         |         |
|---------------|----------|---------|---------|---------|---------|---------|
| PCL-PANI 0.0% | 100.00 ± | 99.92 ± | 99.84 ± | 99.23 ± | 99.23 ± | 98.96 ± |
|               | 0.23     | 0.08    | 0.16    | 0.19    | 0.25    | 0.10    |
| PCL-PANI 0.1% | 100.00 ± | 99.56 ± | 99.47 ± | 99.29 ± | 99.35 ± | 98.99 ± |
|               | 0.13     | 0.18    | 0.24    | 0.32    | 0.22    | 0.22    |
| PCL-PANI 1.0% | 100.00 ± | 99.66 ± | 99.70 ± | 99.16 ± | 98.65 ± | 98.82 ± |
|               | 0.24     | 0.29    | 0.35    | 0.17    | 0.34    | 0.29    |
| PCL-PANI 2.0% | 100.00 ± | 99.68 ± | 99.78 ± | 99.39 ± | 99.39 ± | 98.80 ± |
|               | 0.25     | 0.22    | 0.20    | 0.23    | 0.23    | 0.17    |

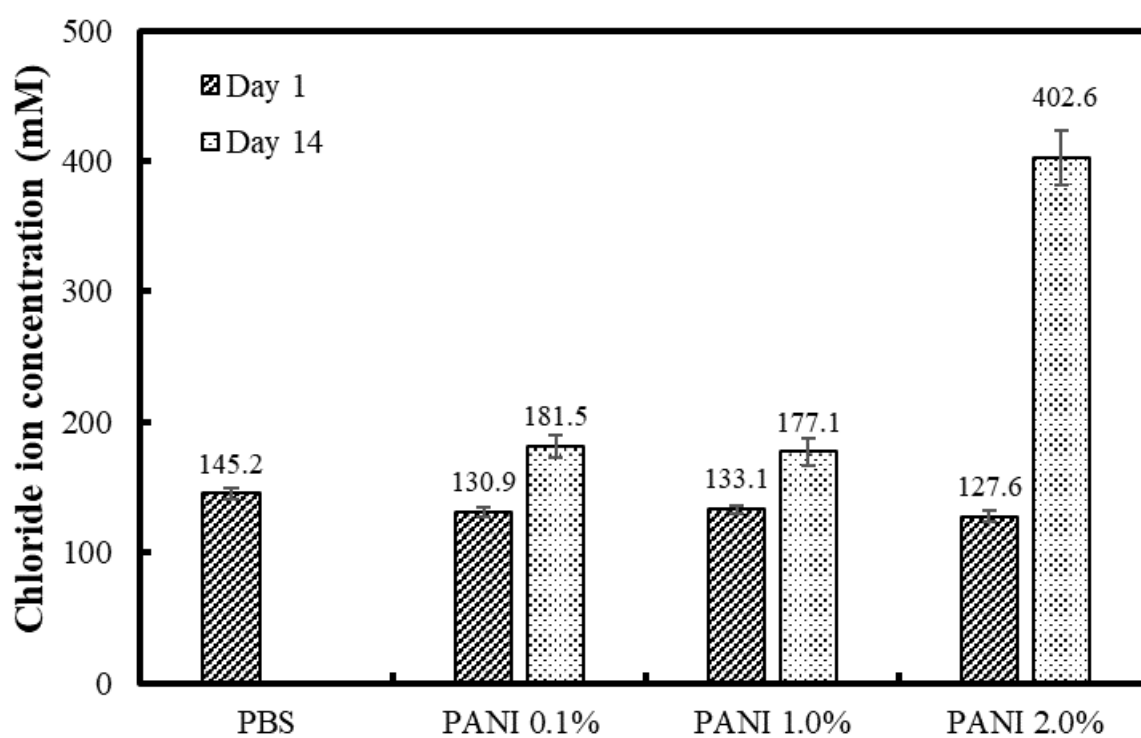

**Figure S4.** Determination of chloride ion in phosphate buffered saline (PBS) solution after immersion of scaffolds for 1 and 14 days (n = 3).

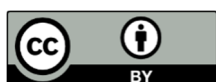

Supplement: s1 [file s1]
